# Supplementary material for: Appropriateness of Antibiotic Therapy and its Association with Clinical Outcomes among Critically Ill Patients: A Retrospective Study from the United Arab Emirates
Source: Research Square preprint supplement (doi:10.21203/rs.3.rs-8481307/v1), 2026-01-28
Supplement: Supplementary file 1 [file 5d8474bf05a349d44e768f61.docx]

Table S1. Appropriateness of antibiotic therapy stratified by medical specialty

| **Medical specialty** | **Total, n (%)*** | **Patients with appropriate empiric initiation, n (%)†** | **Patients with positive culture, n (%)†** | **Patients receiving inappropriate therapy, n (%)†** |
| --- | --- | --- | --- | --- |
| Internal medicine | 173 (34.6) | 162 (93.6) | 88 (50.9) | 47 (27.2) |
| Neurosurgery | 67 (13.4) | 65 (97.0) | 21 (31.3) | 42 (62.7) |
| ICU | 56 (11.2) | 50 (89.3) | 33 (58.9) | 18 (32.1) |
| General surgery | 41 (8.2) | 40 (97.6) | 20 (48.8) | 12 (29.3) |
| Obstetrics and gynecology | 38 (7.6) | 36 (94.7) | 6 (15.8) | 17 (44.7) |
| Oncology | 33 (6.6) | 33 (100) | 12 (36.4) | 7 (21.2) |
| Hematology | 22 (4.4) | 22 (100) | 12 (54.5) | 9 (40.9) |
| Cardiology | 18 (3.6) | 16 (88.9) | 8 (44.4) | 5 (27.8) |
| Thoracic surgery | 11 (2.2) | 11 (100) | 4 (36.4) | 8 (72.7) |
| Neurology | 8 (1.6) | 8 (100) | 4 (50.0) | 1 (12.5) |
| Vascular surgery | 8 (1.6) | 7 (87.5) | 6 (75.0) | 3 (37.5) |
| Plastic surgery | 8 (1.6) | 8 (100) | 2 (25.0) | 5 (62.5) |
| Nephrology | 6 (1.2) | 6 (100) | 4 (66.7) | 0 (0) |
| Palliative care | 3 (0.6) | 3 (100) | 2 (66.7) | 1 (33.3) |
| Otorhinolaryngology | 3 (0.6) | 3 (100) | 1 (33.3) | 2 (66.7) |
| Oral and maxillofacial surgery | 3 (0.6) | 3 (100) | 2 (66.7) | 2 (66.7) |
| Urology | 1 (0.2) | 1 (100) | 1 (100) | 0 (0) |
| Breast surgery | 1 (0.2) | 1 (100) | 0 (0) | 1 (100) |
| **Total** | **500** | **475 (95.0)** | **226 (45.2)** | **180 (36.0)** |

**Notes:** *Percentages are calculated relative to the total cohort (N = 500). **†**Percentages are calculated within each specialty using its respective total as the denominator. **Abbreviations:** ICU: Intensive Care Unit
